# Supplementary material for: Multiple Loci Associated with Renal Function in African Americans
Source: PubMed Central journal article supplement (PMC3441677; doi:10.1371/journal.pone.0045112), 2012-09-13

SYPL2

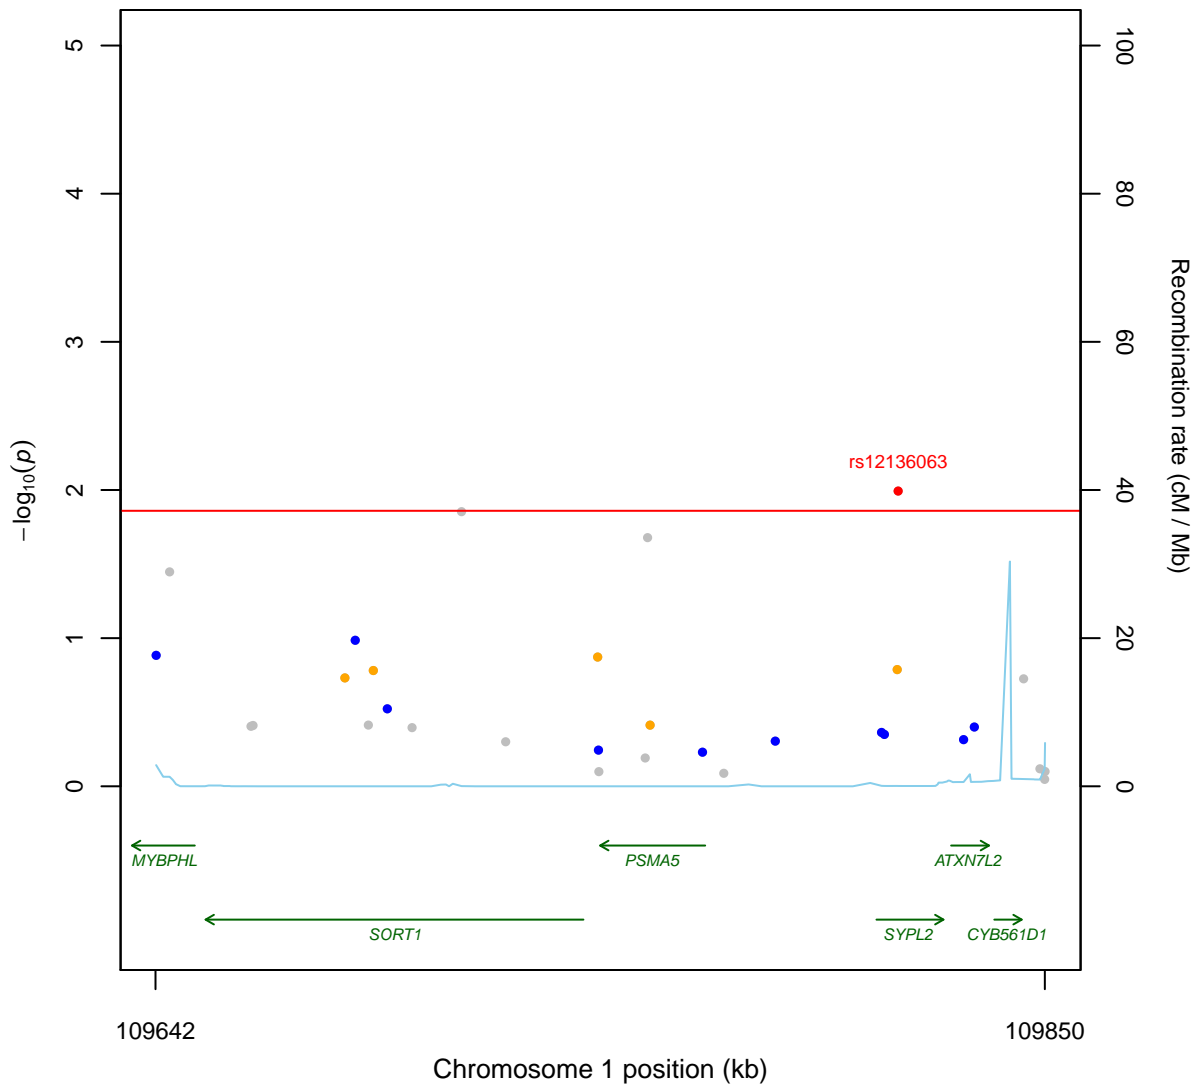

# ANXA9

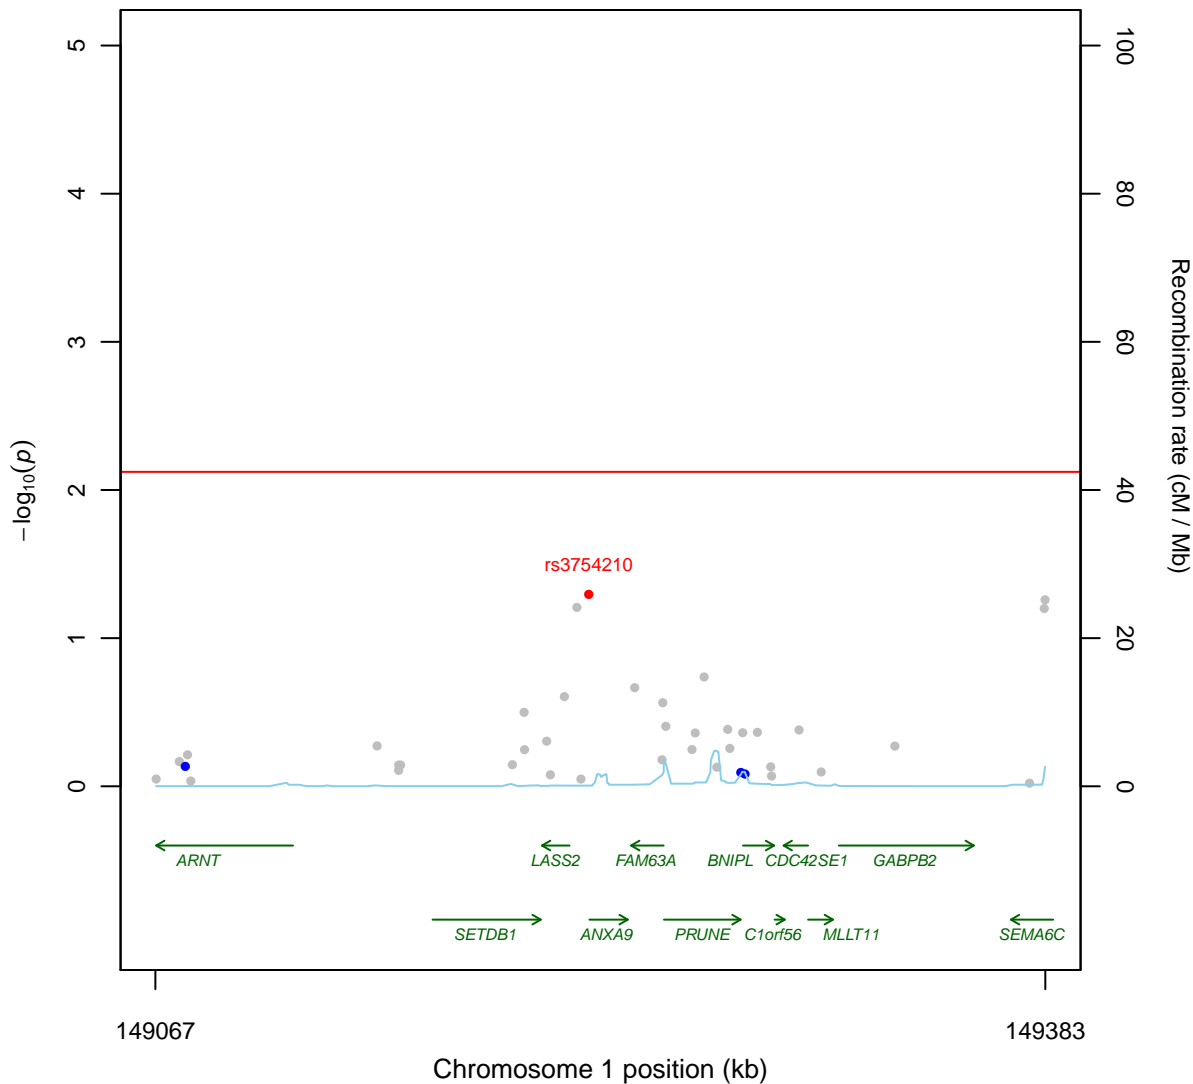

# GCKR

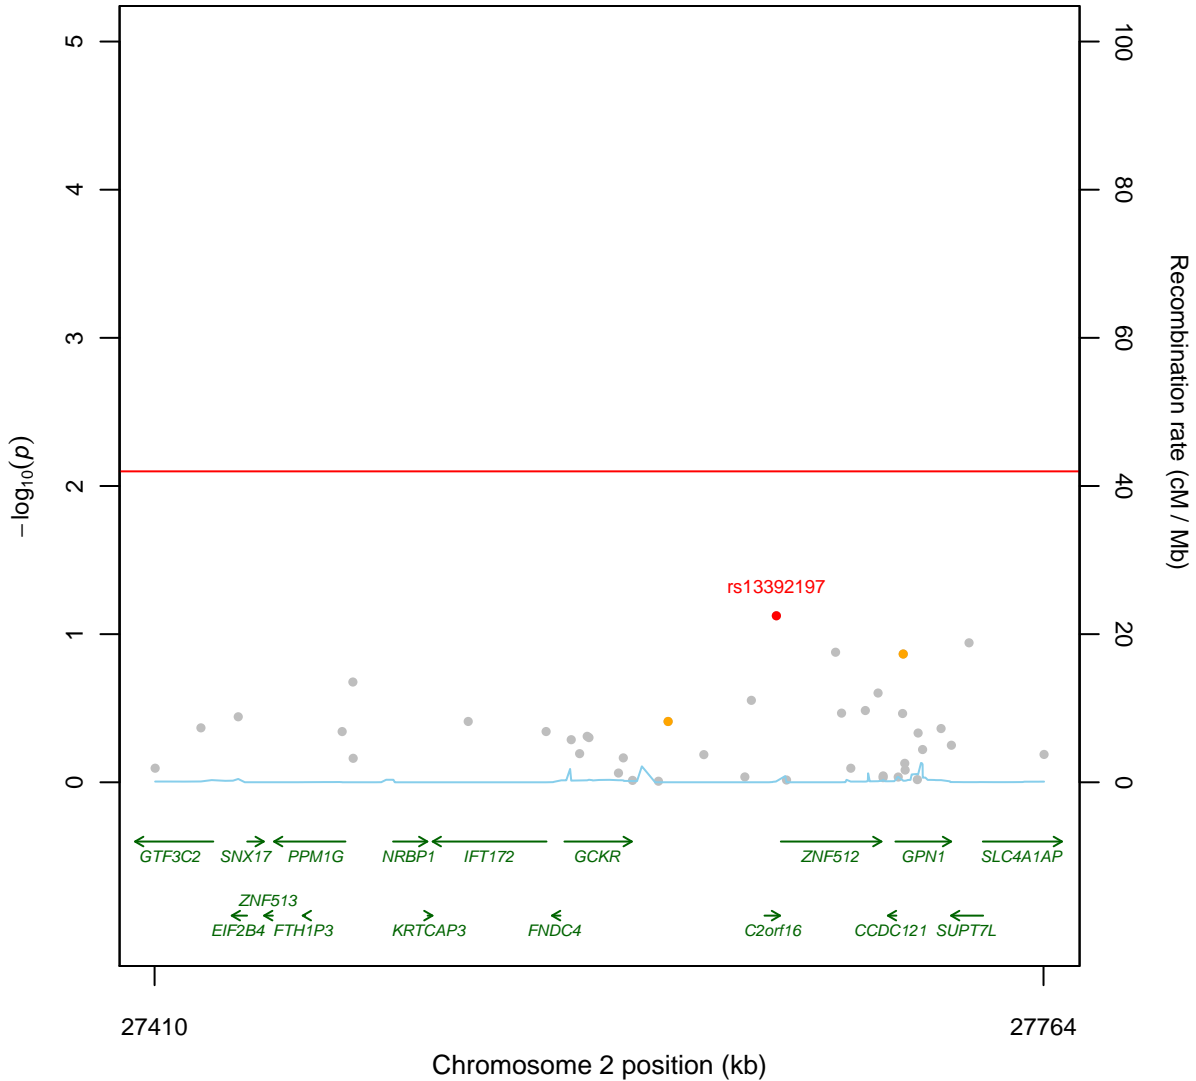

NAT8

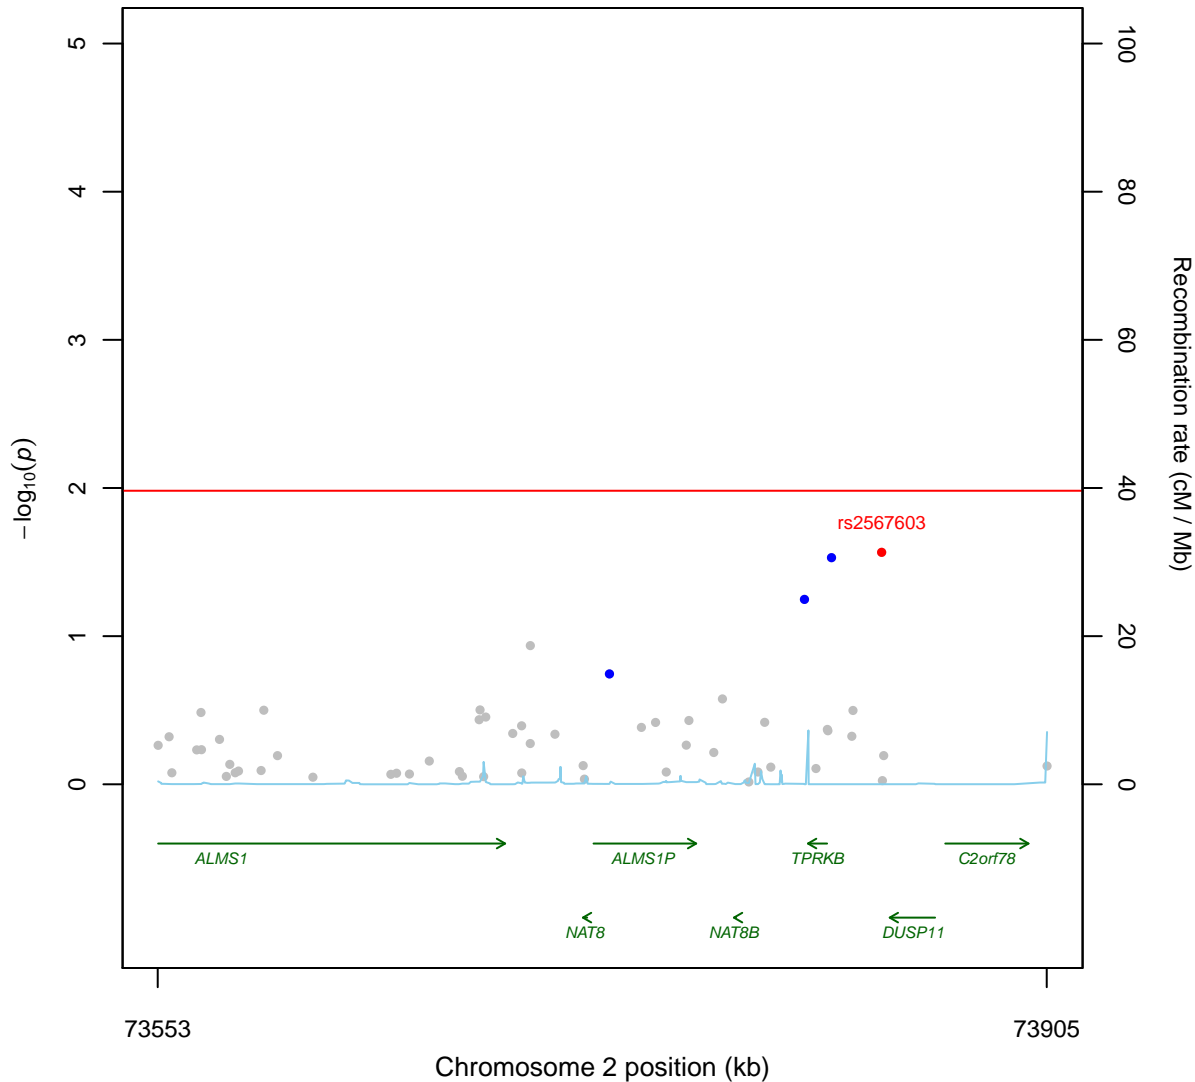

CPS1

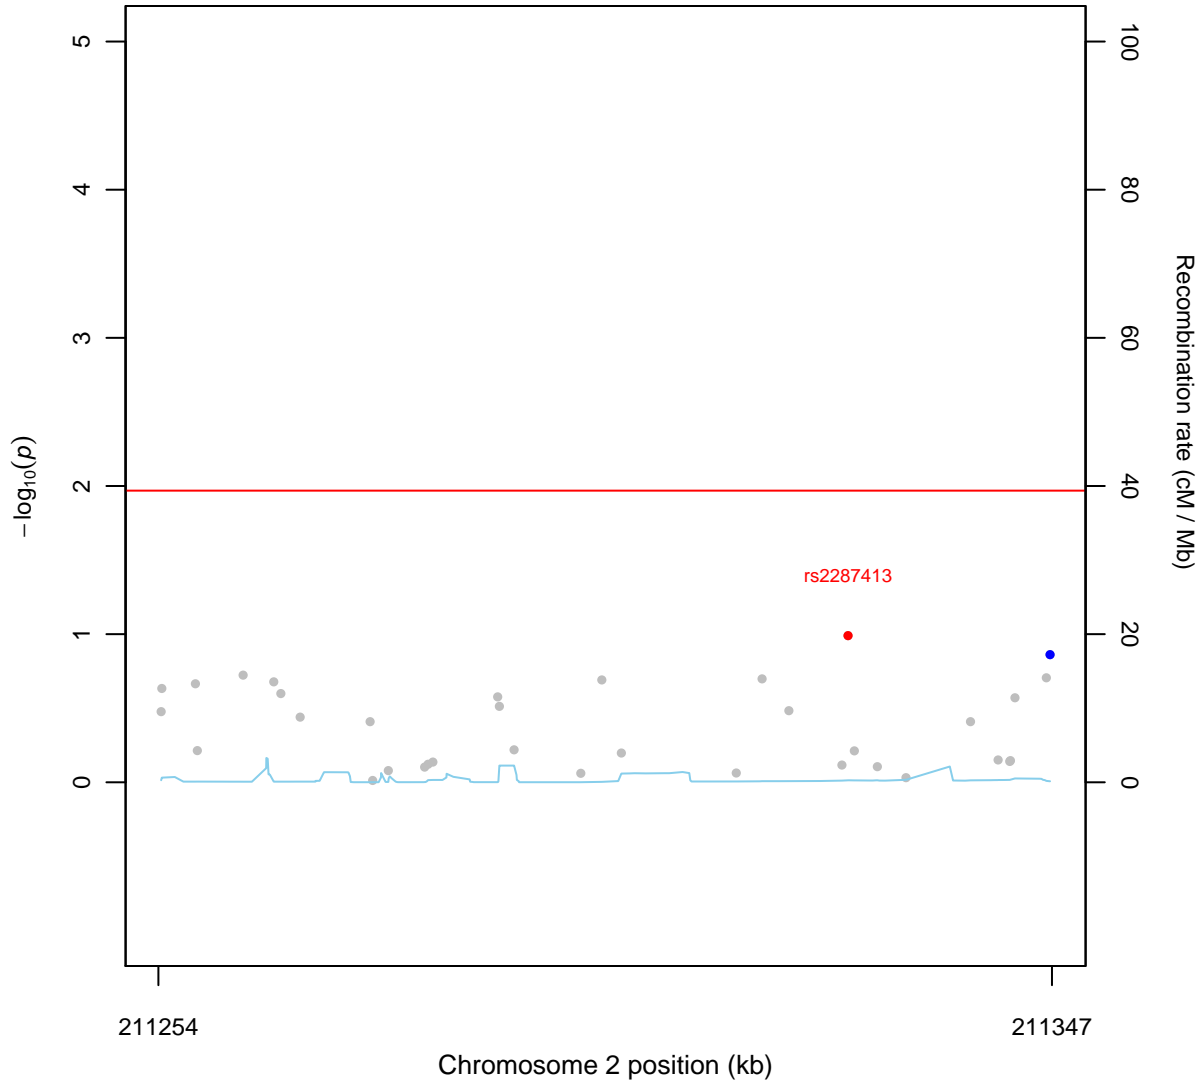

TFDP2

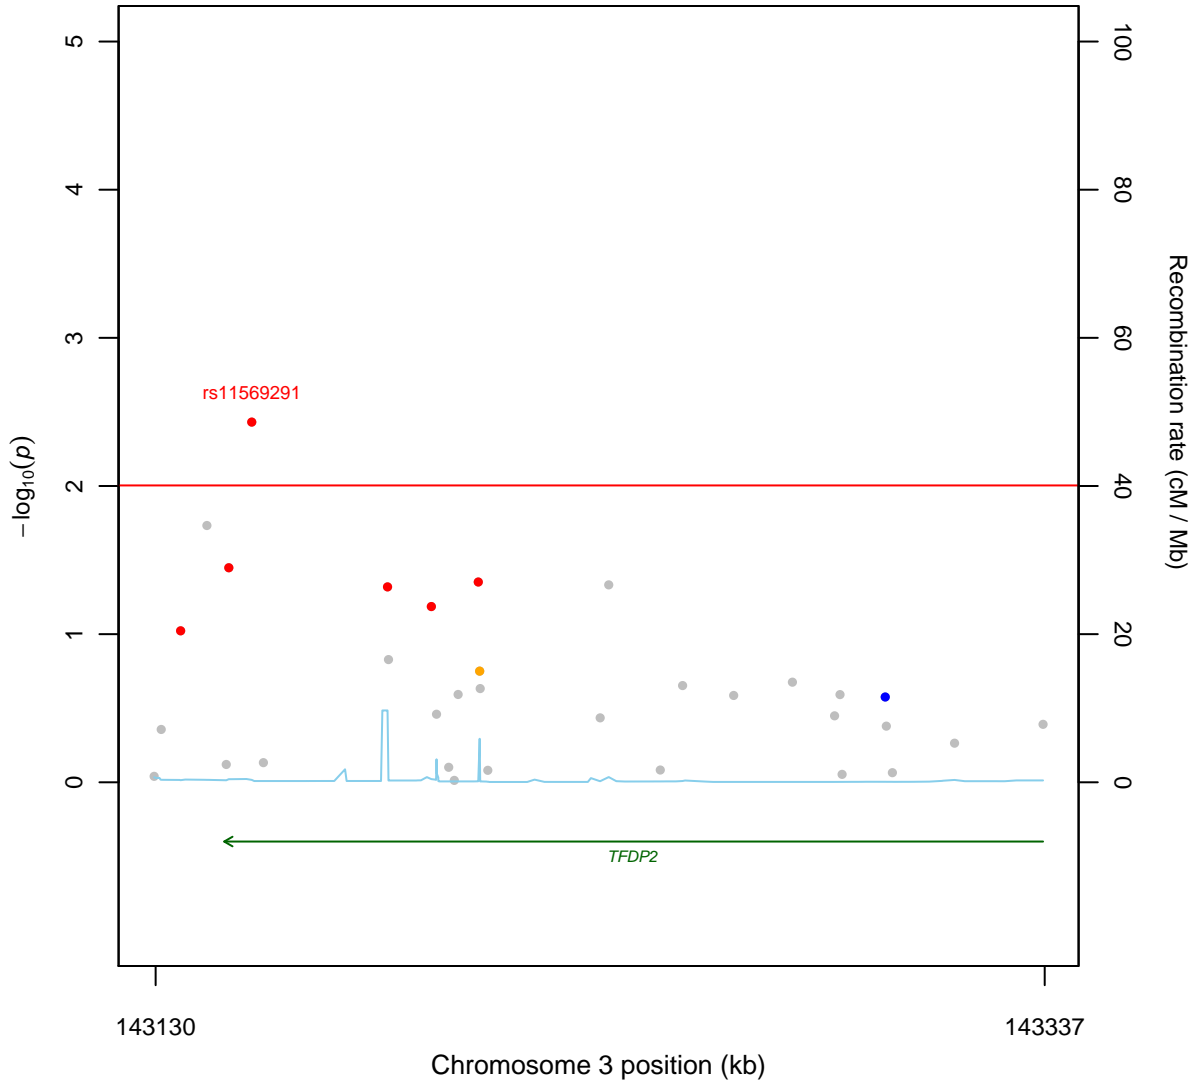

SHROOM3

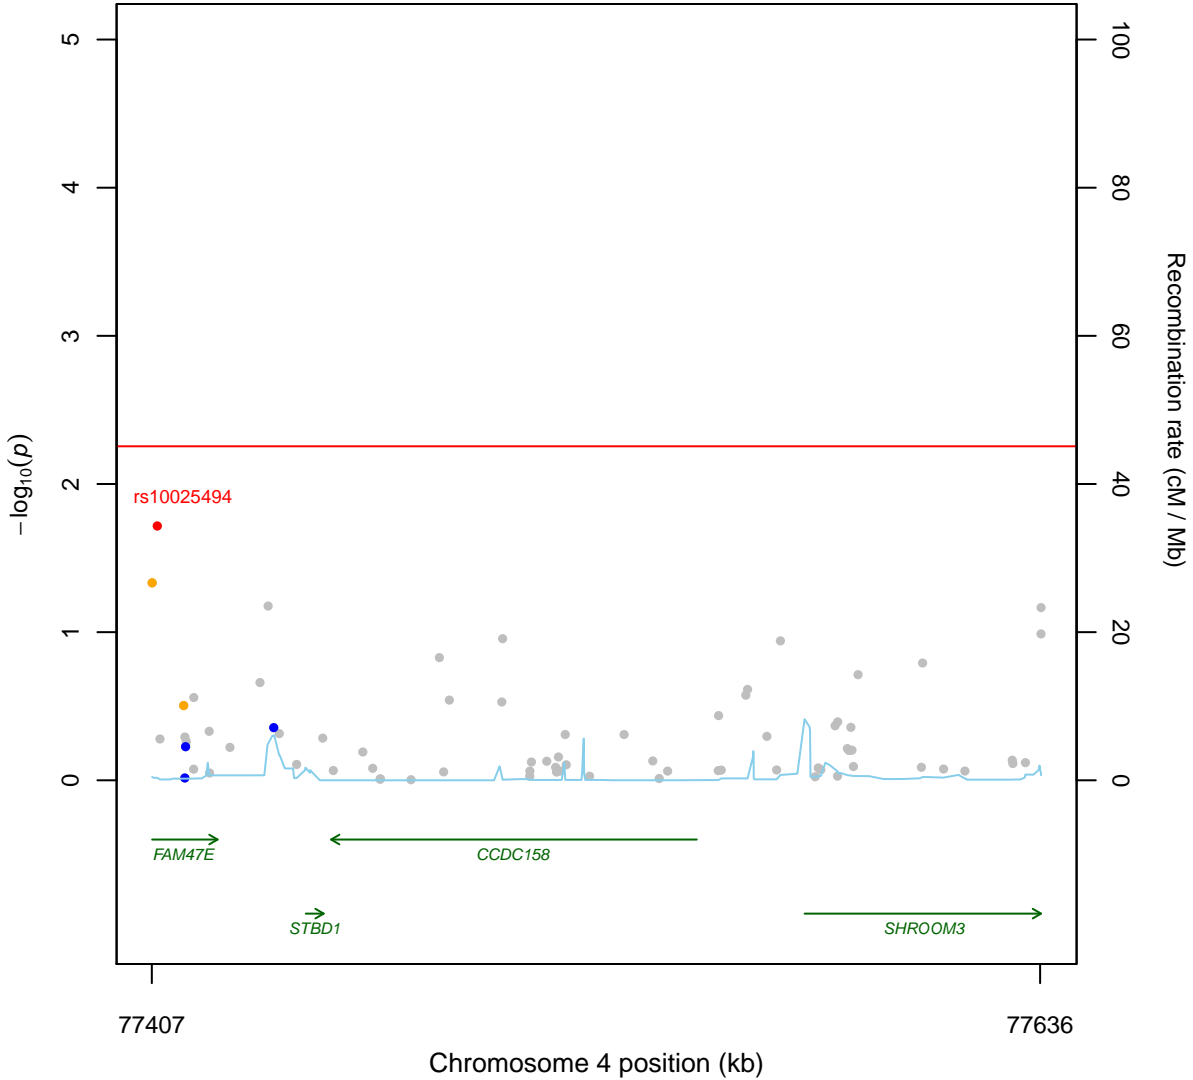

DAB2

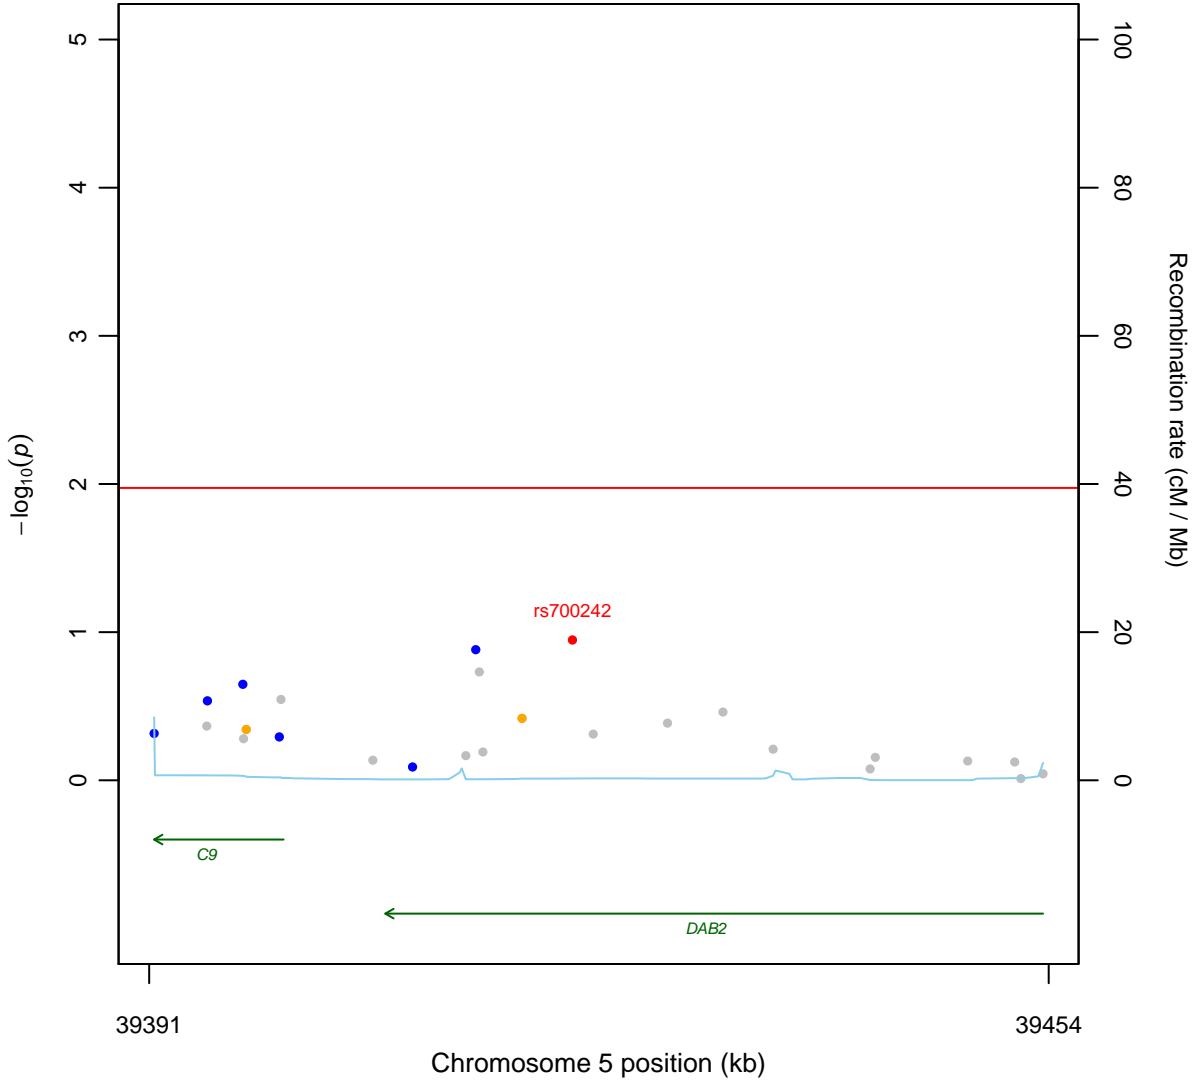



SLC34A1

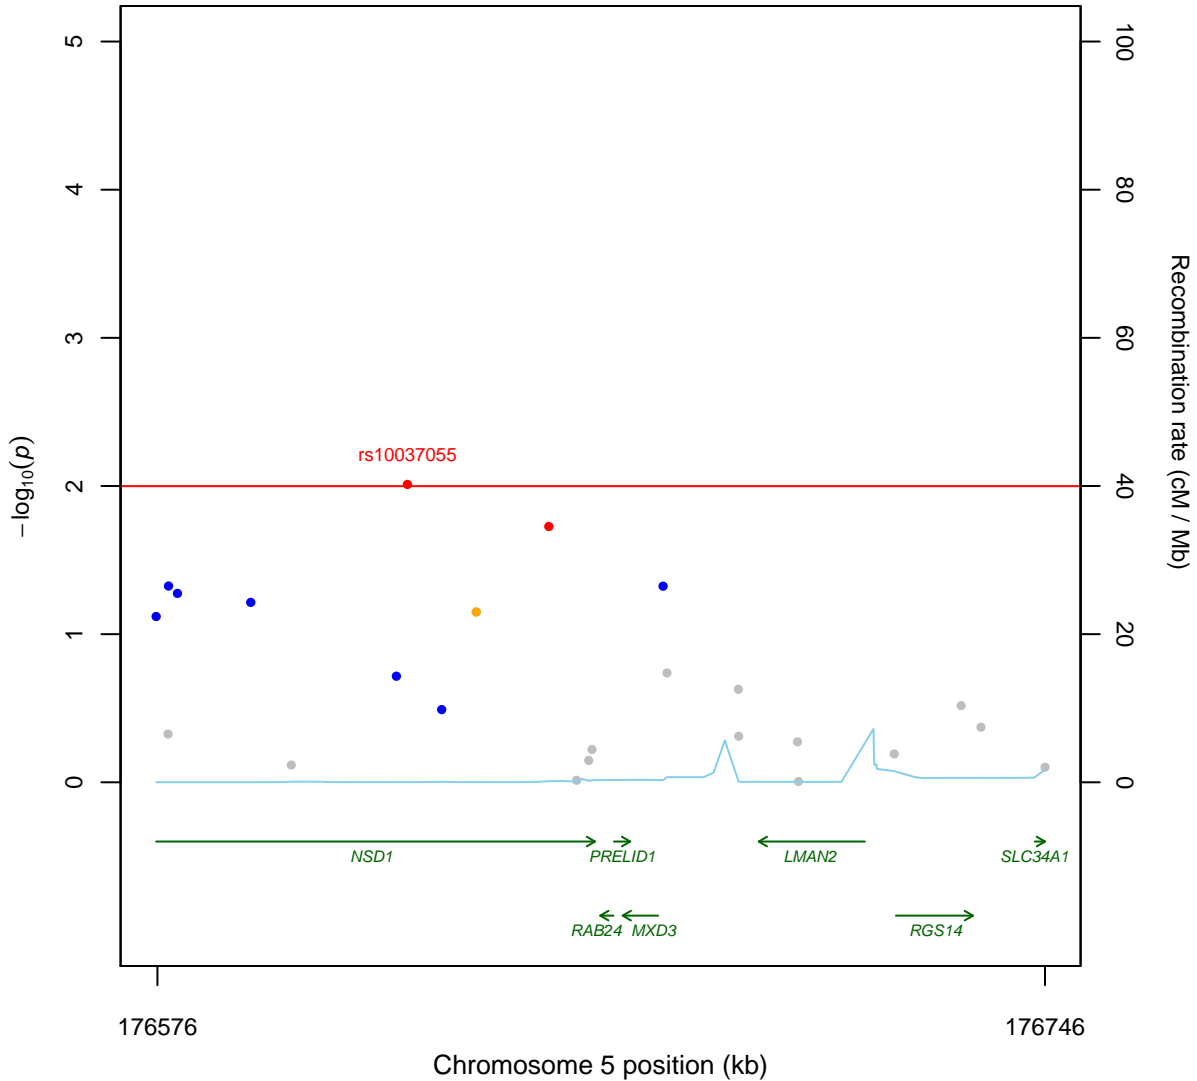

VEGFA

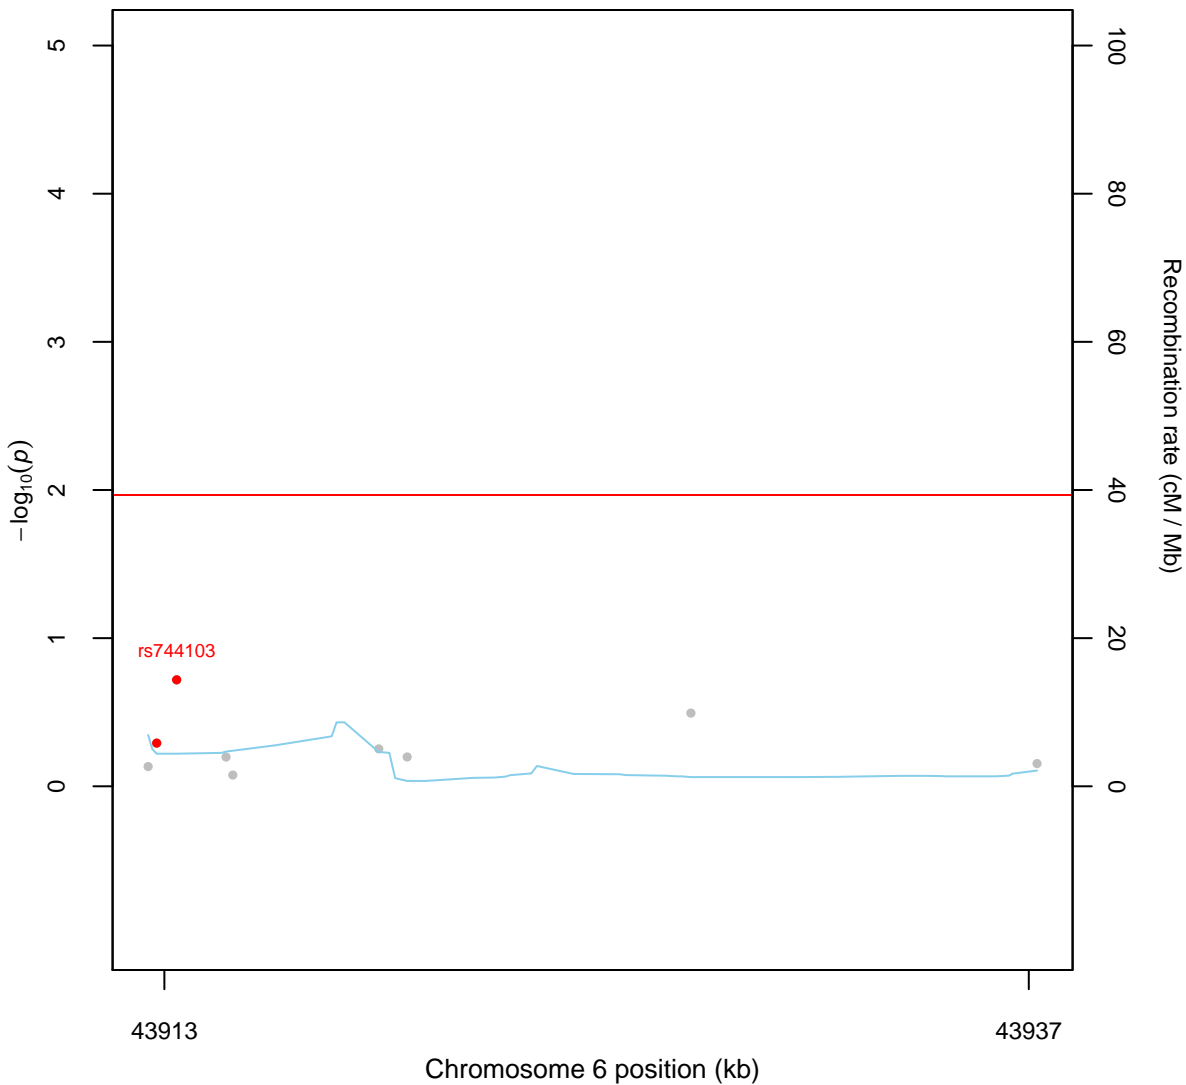

SLC22A2

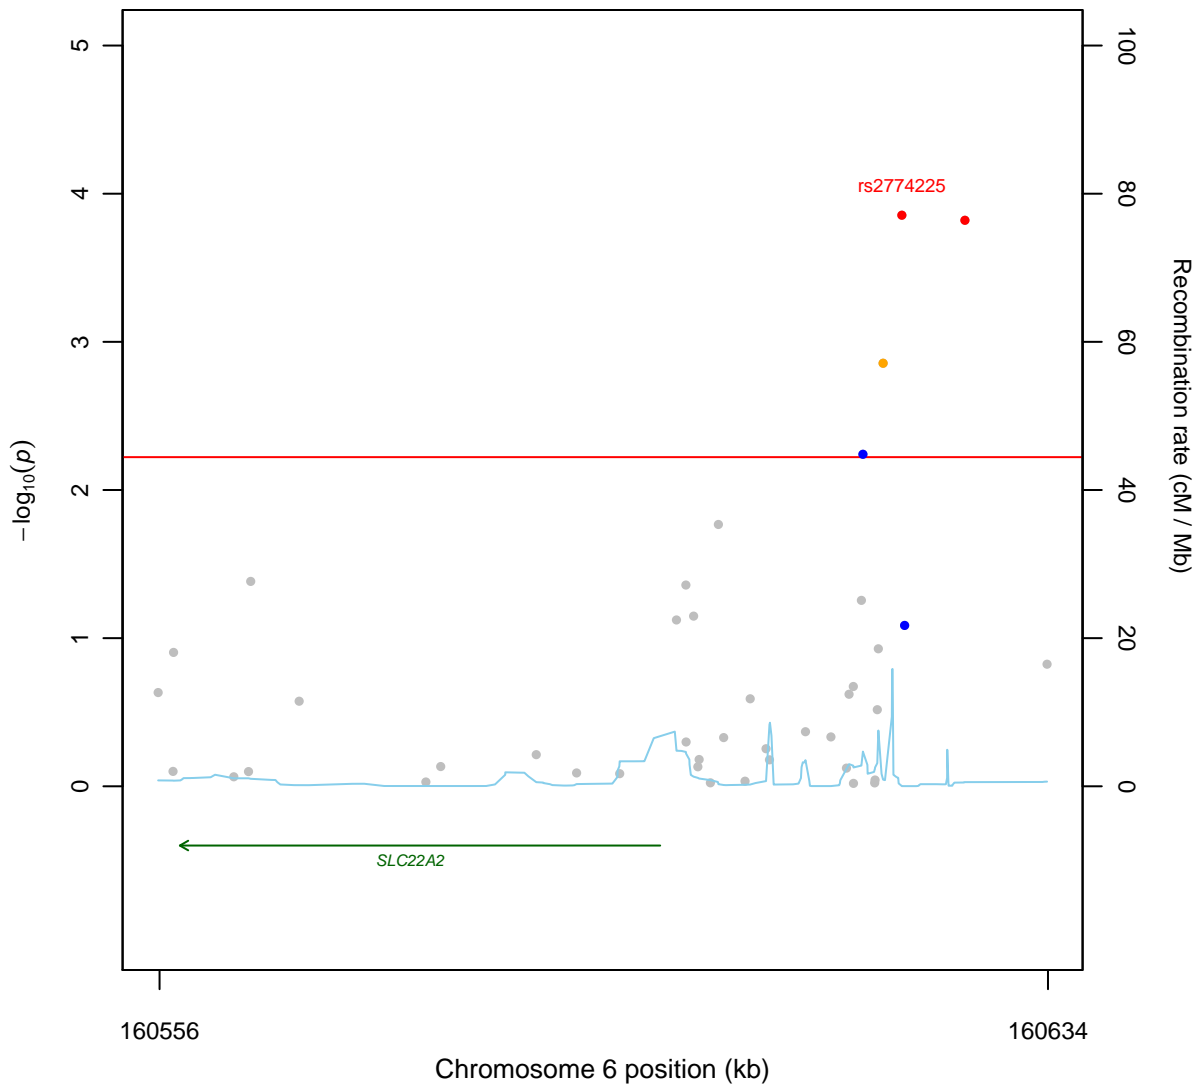

*PHTF2*

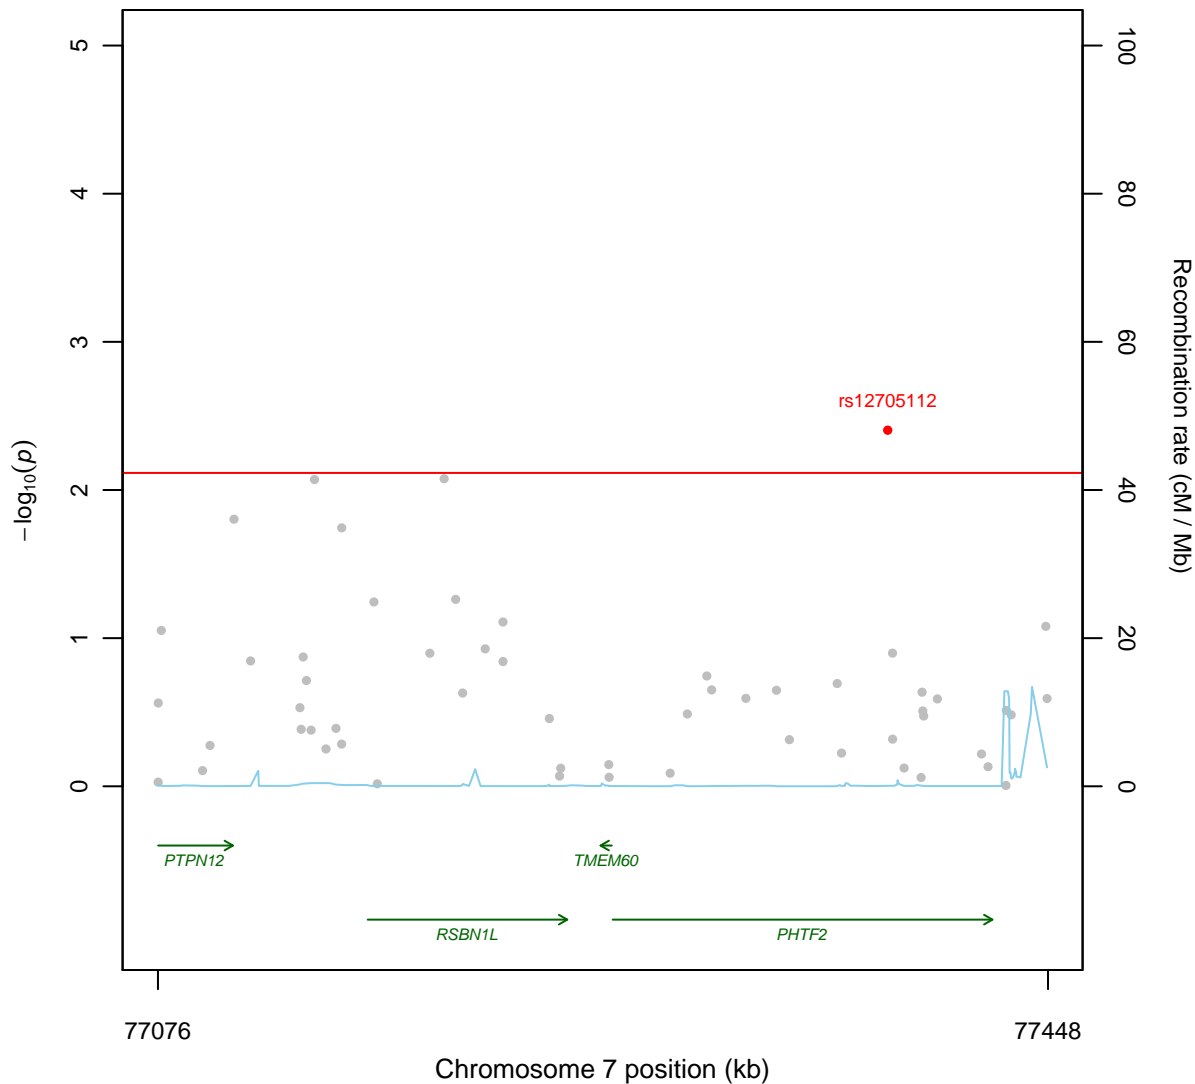

PIP5K1B / FAM122A

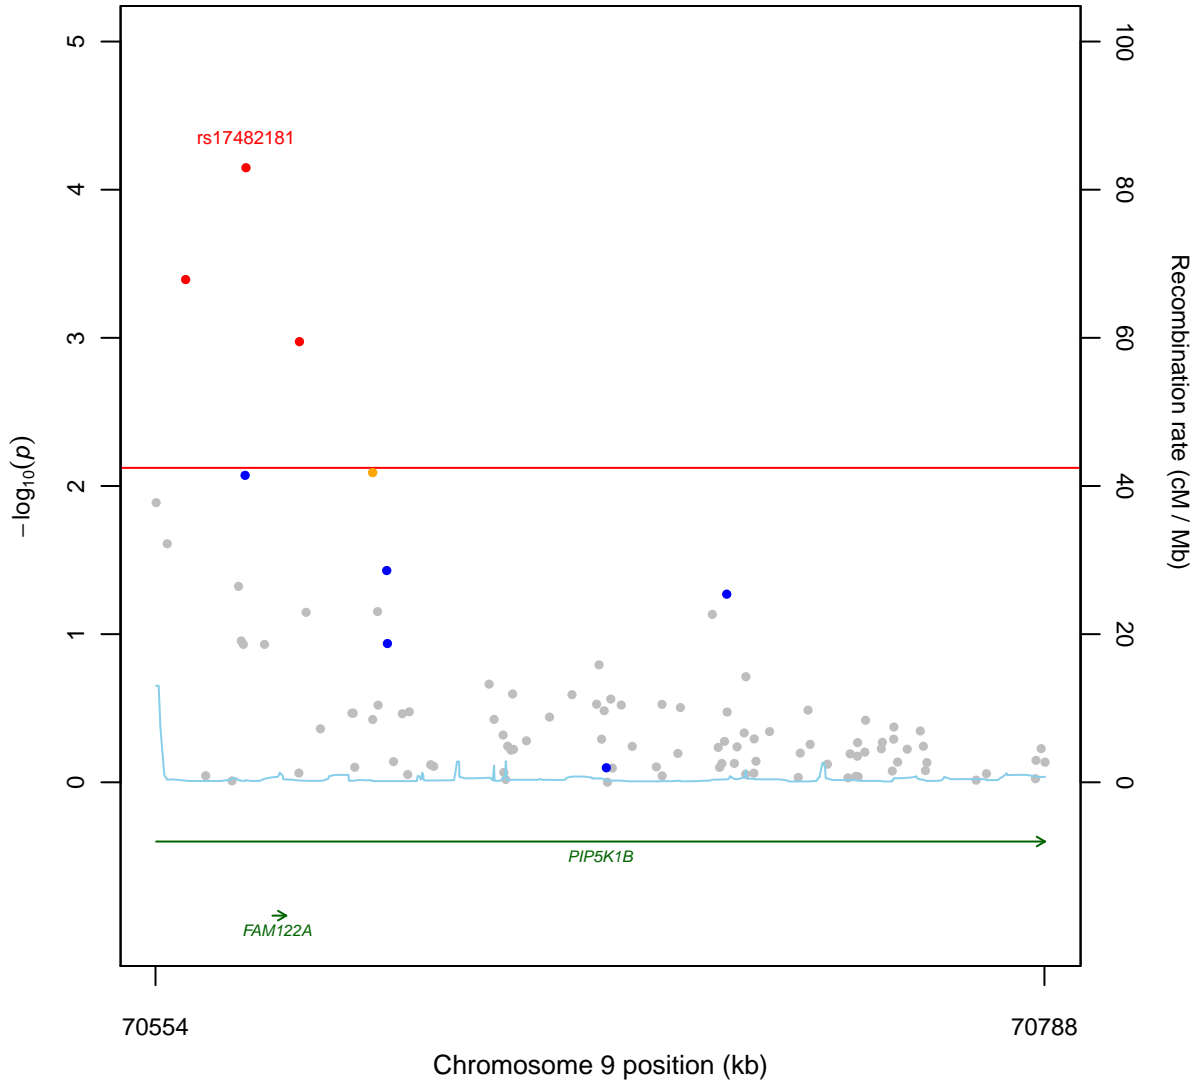

WDR37

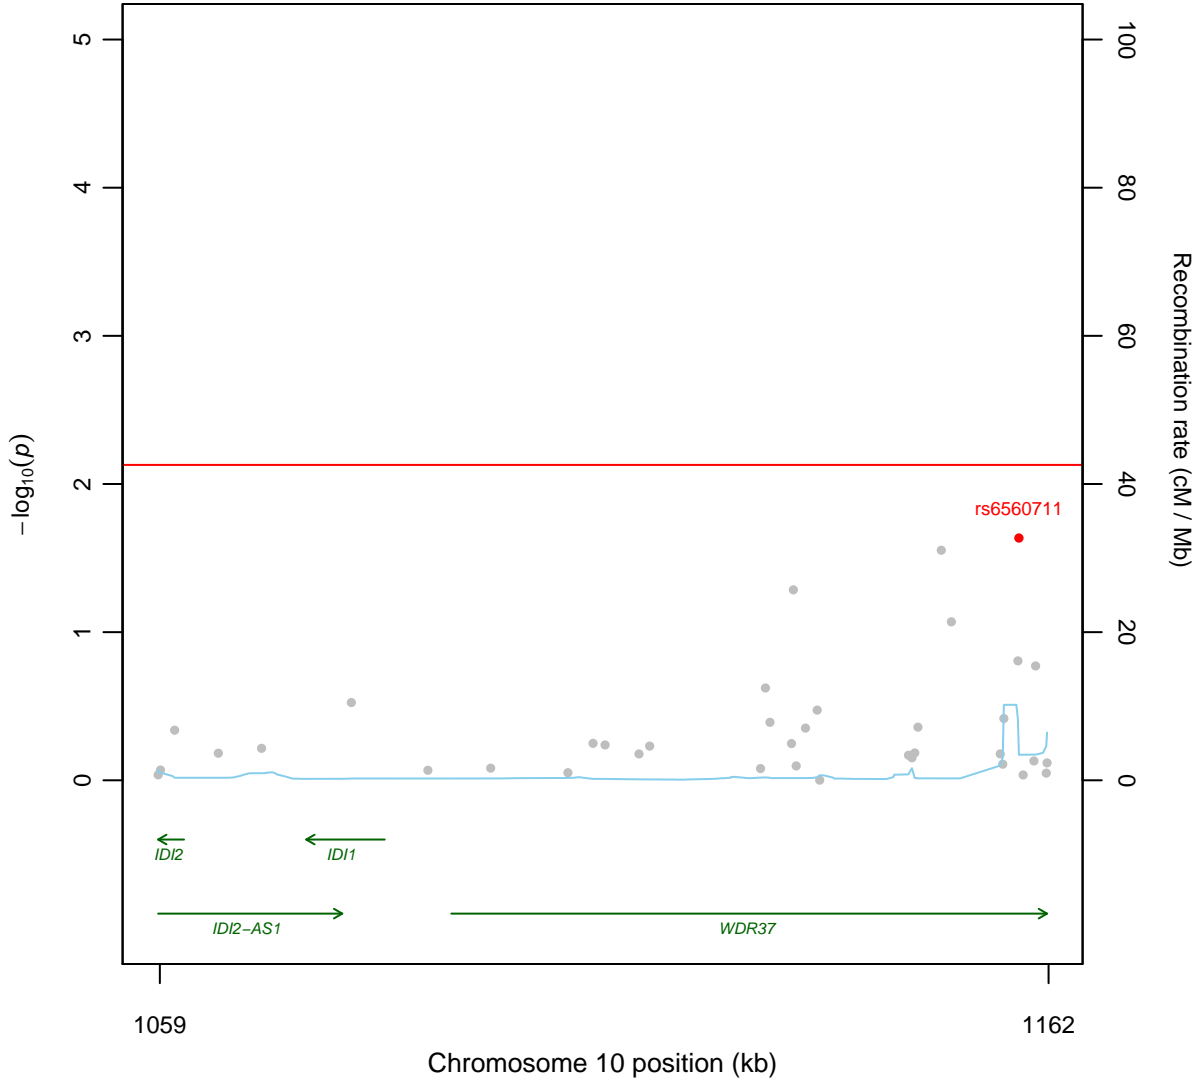

OVOL1

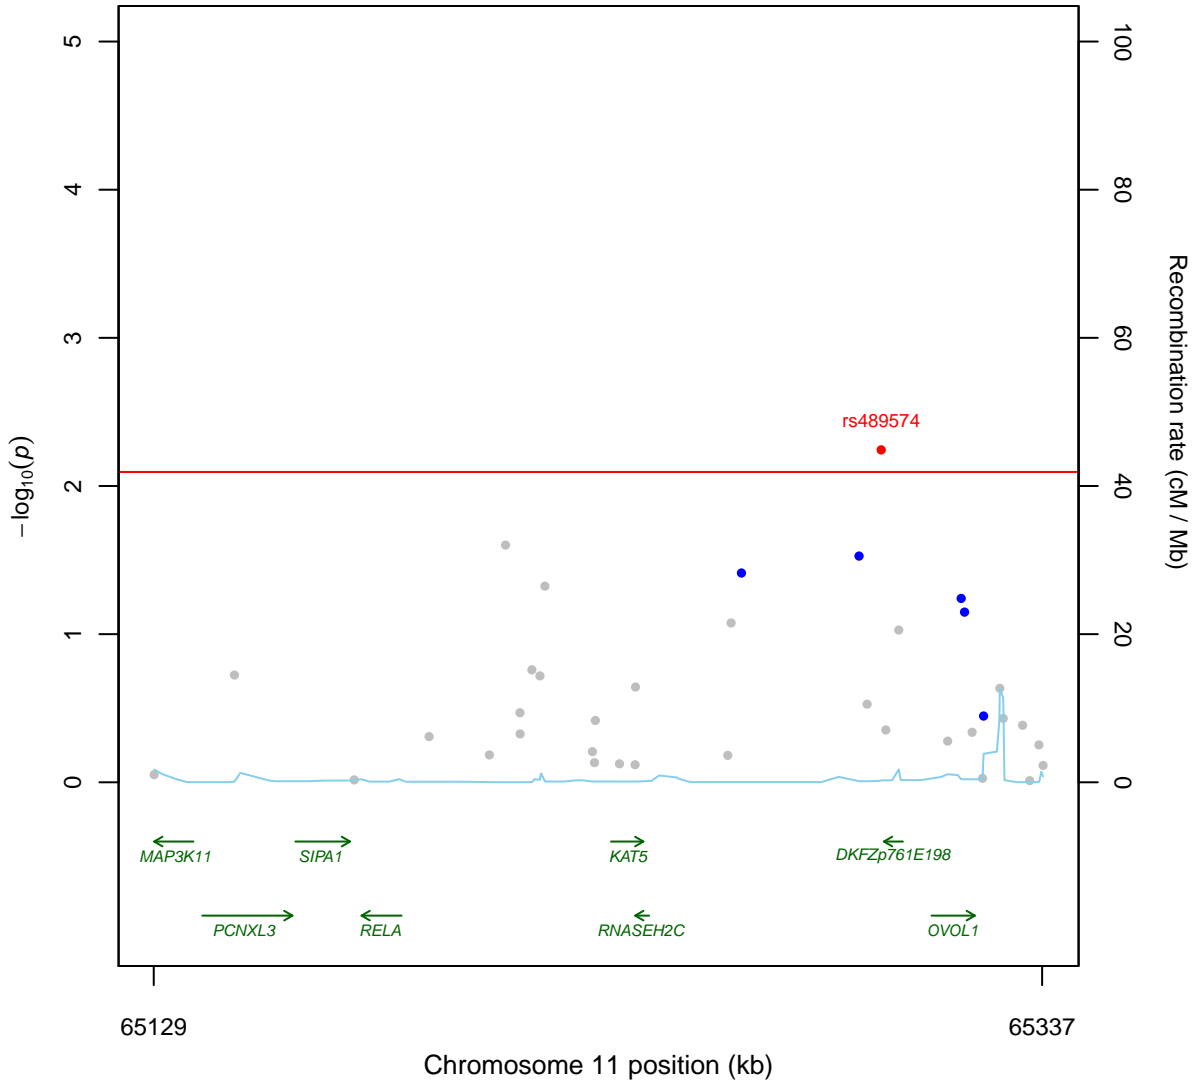

SLC6A13

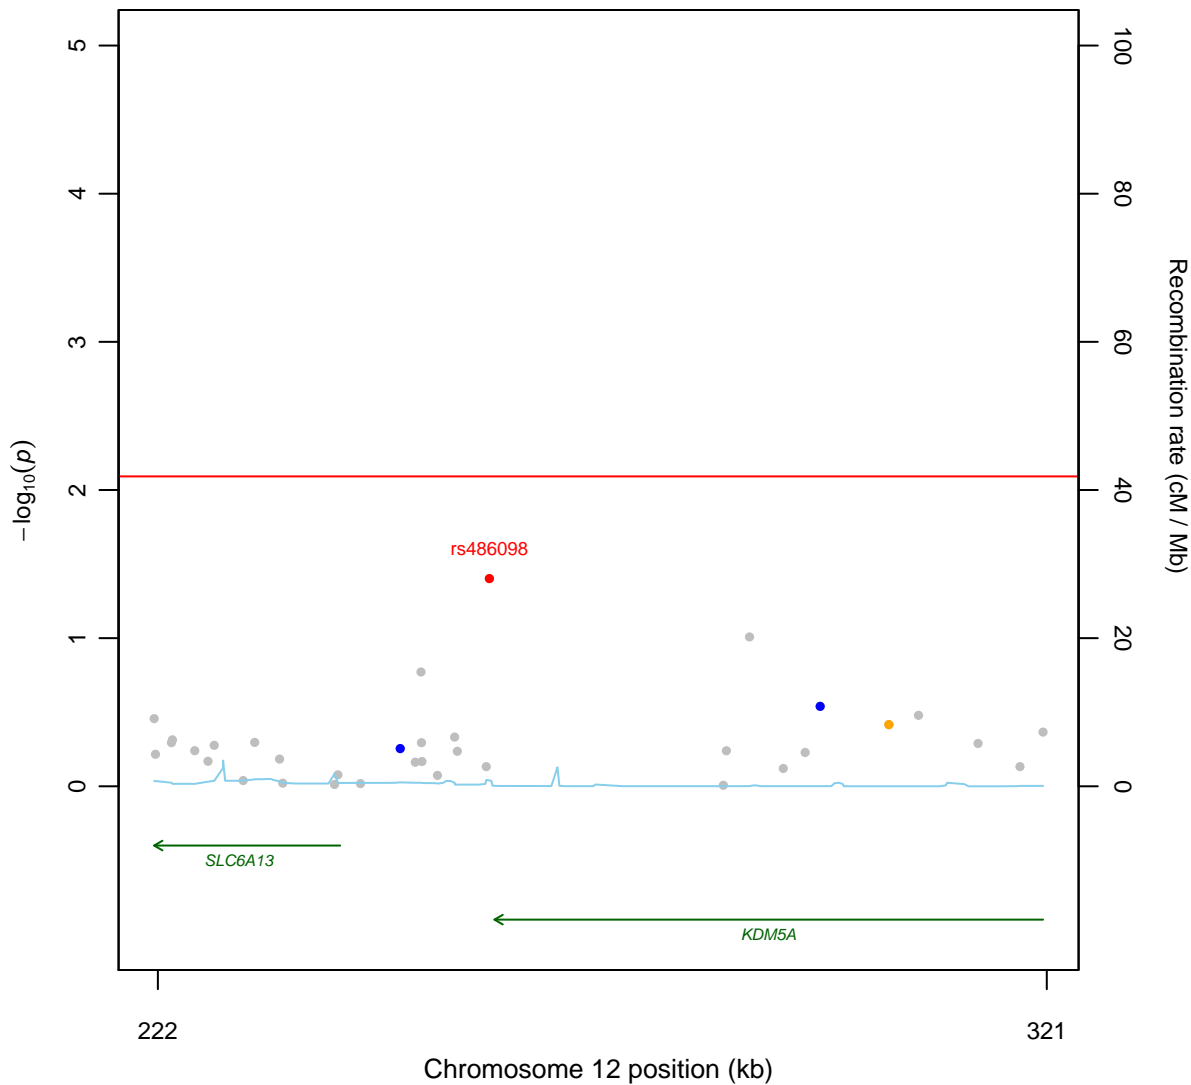



*DACH1*

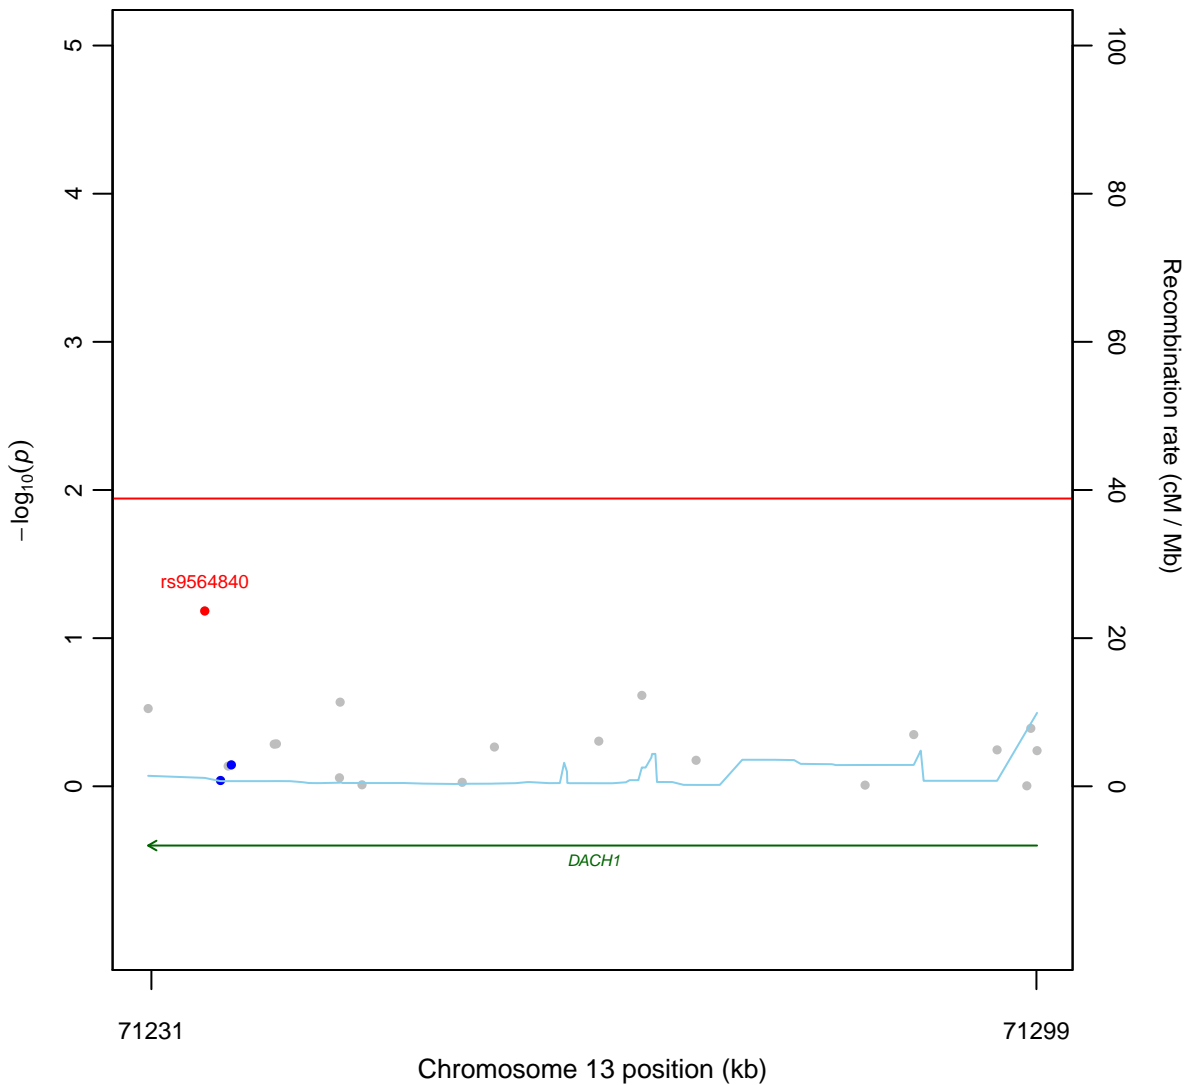

GATM / SPATA5L1

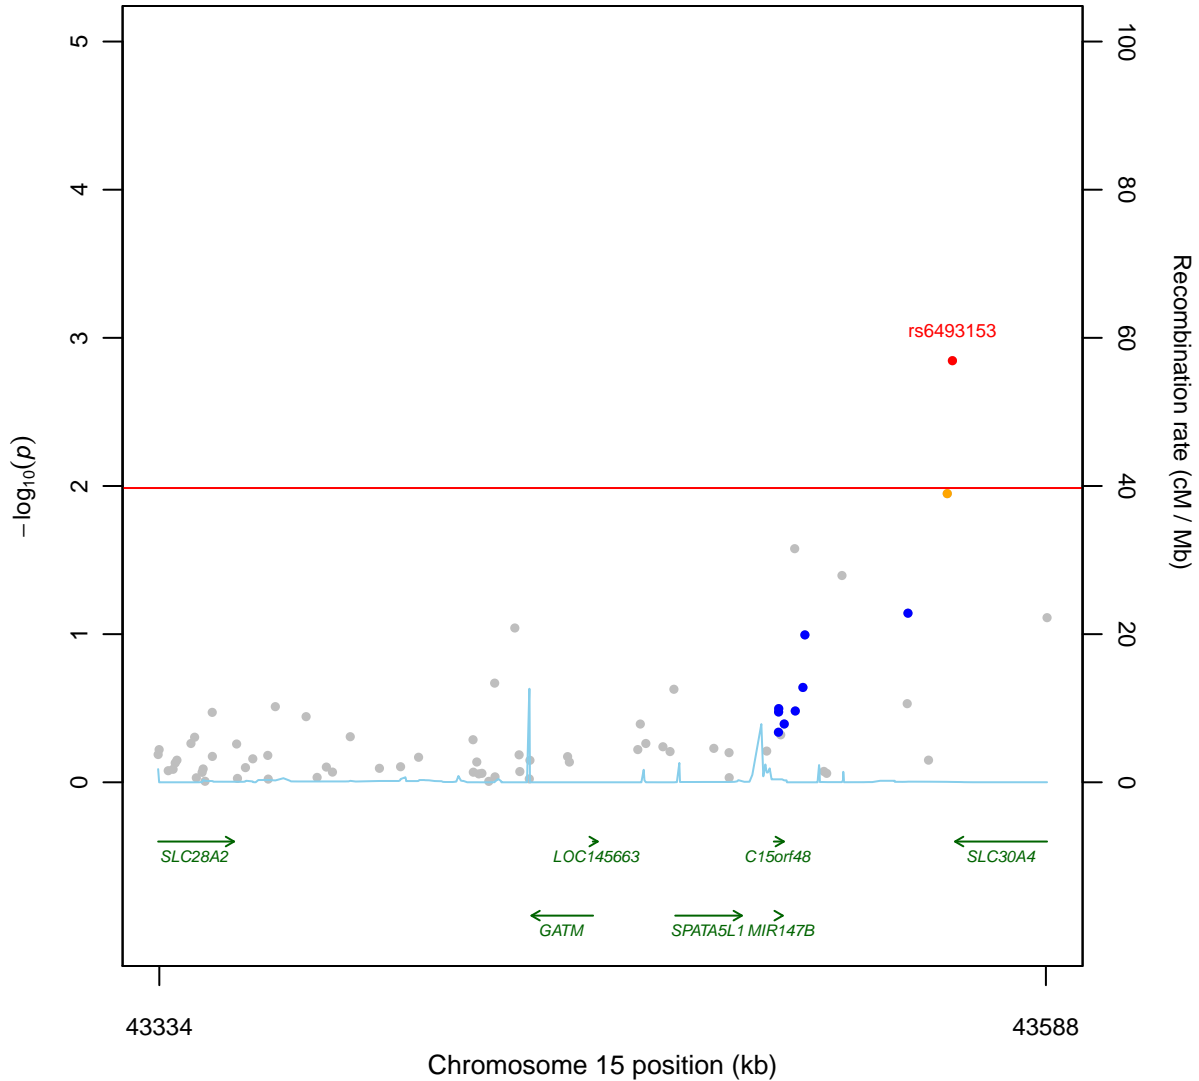

WDR72

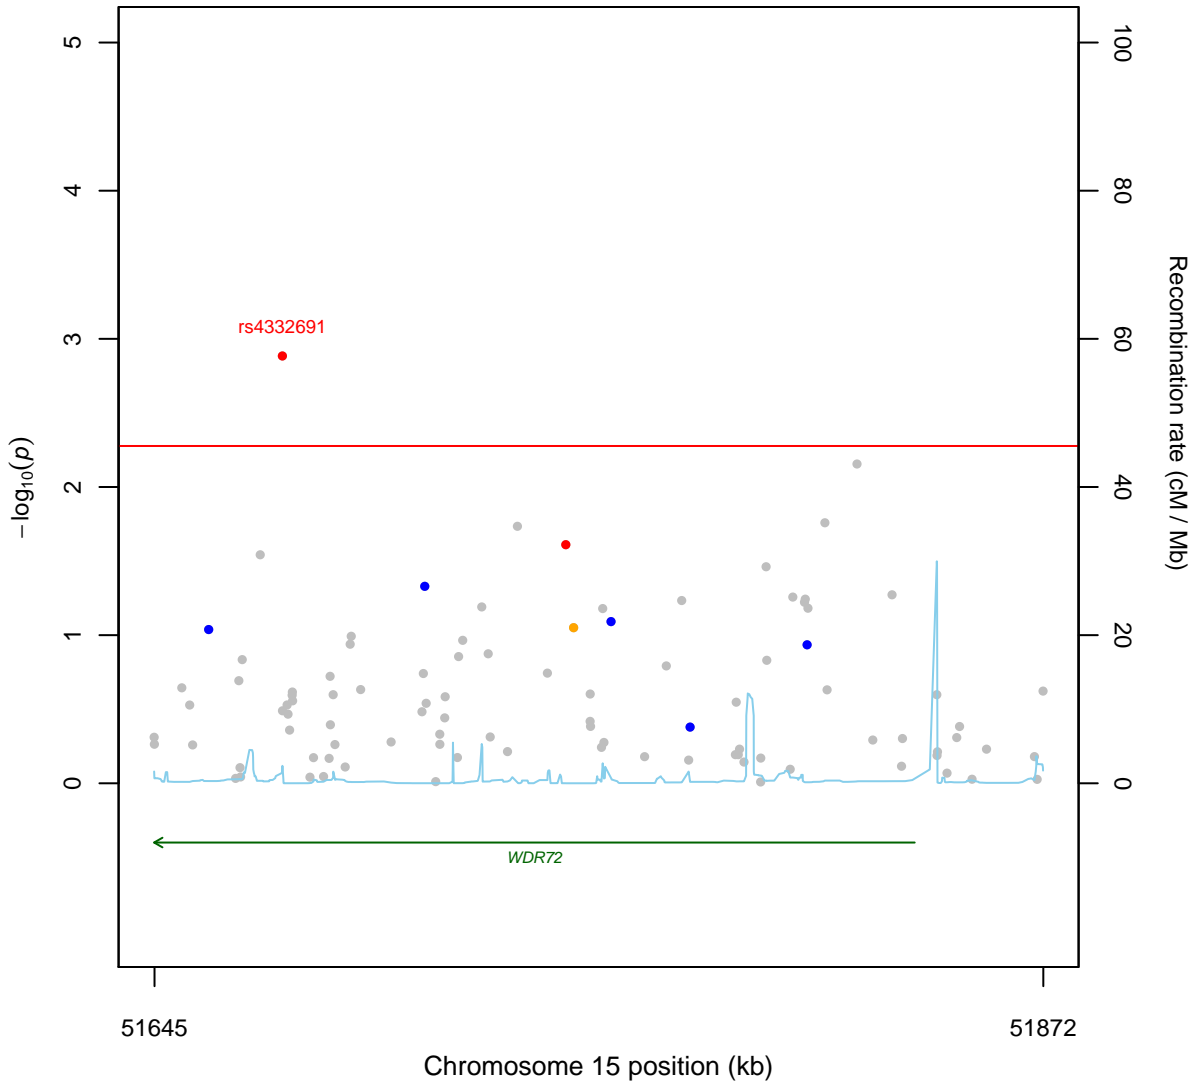

*UBE2Q2*

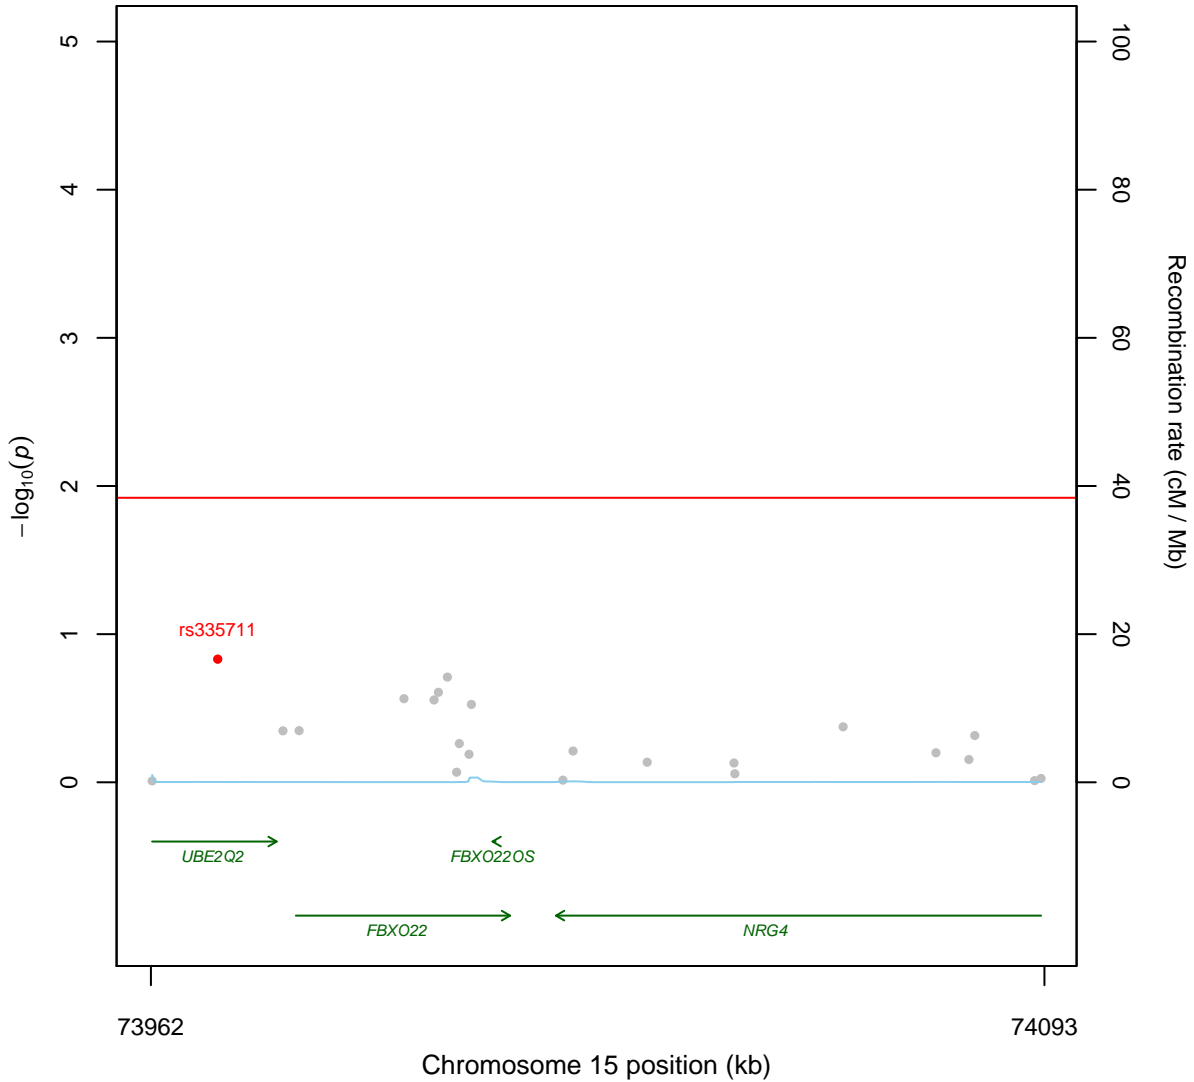

UMOD

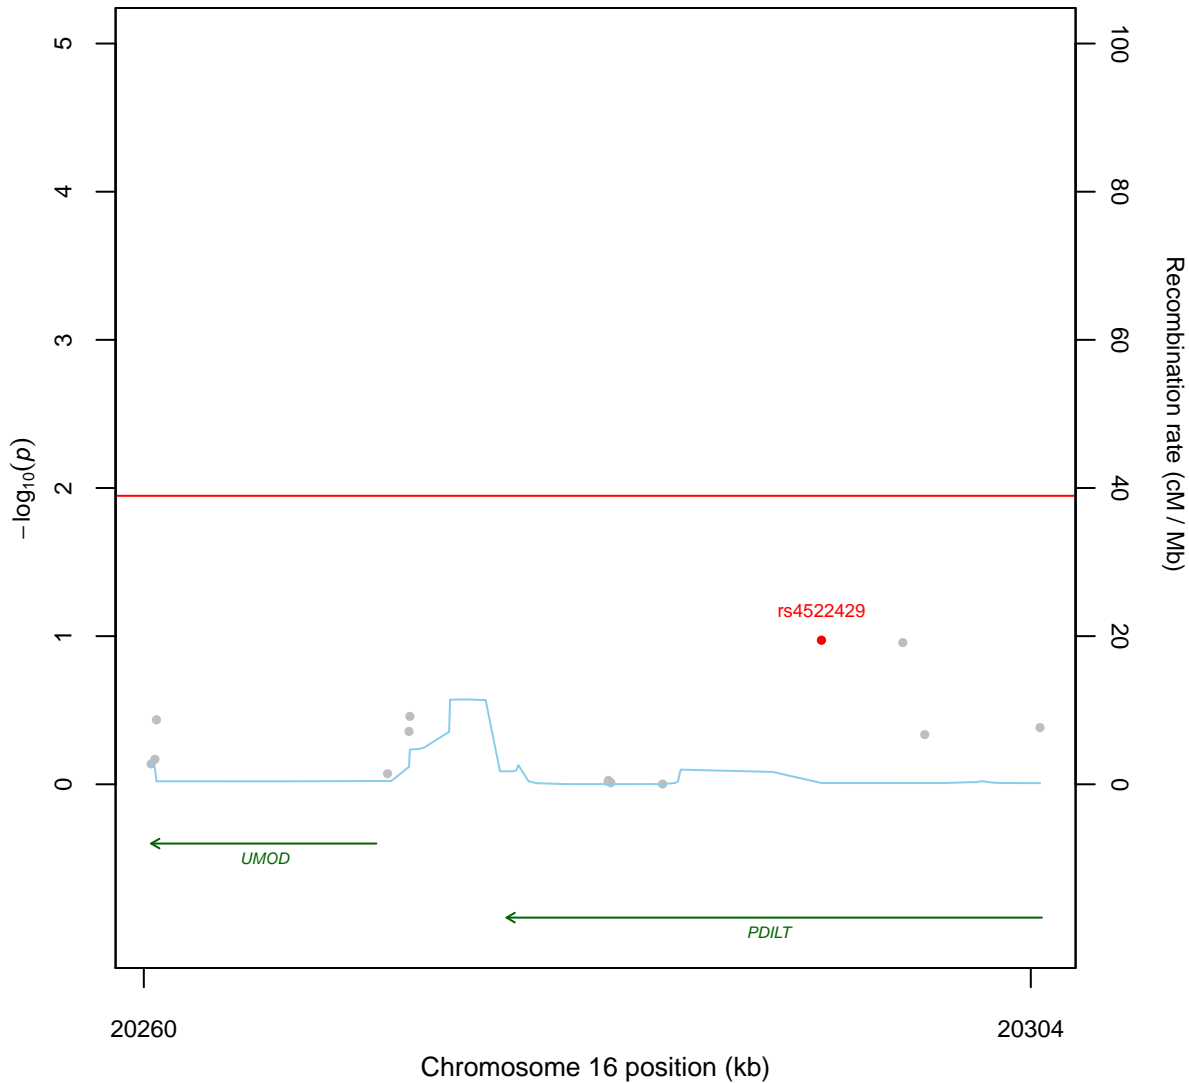

BCAS3 / TBX2

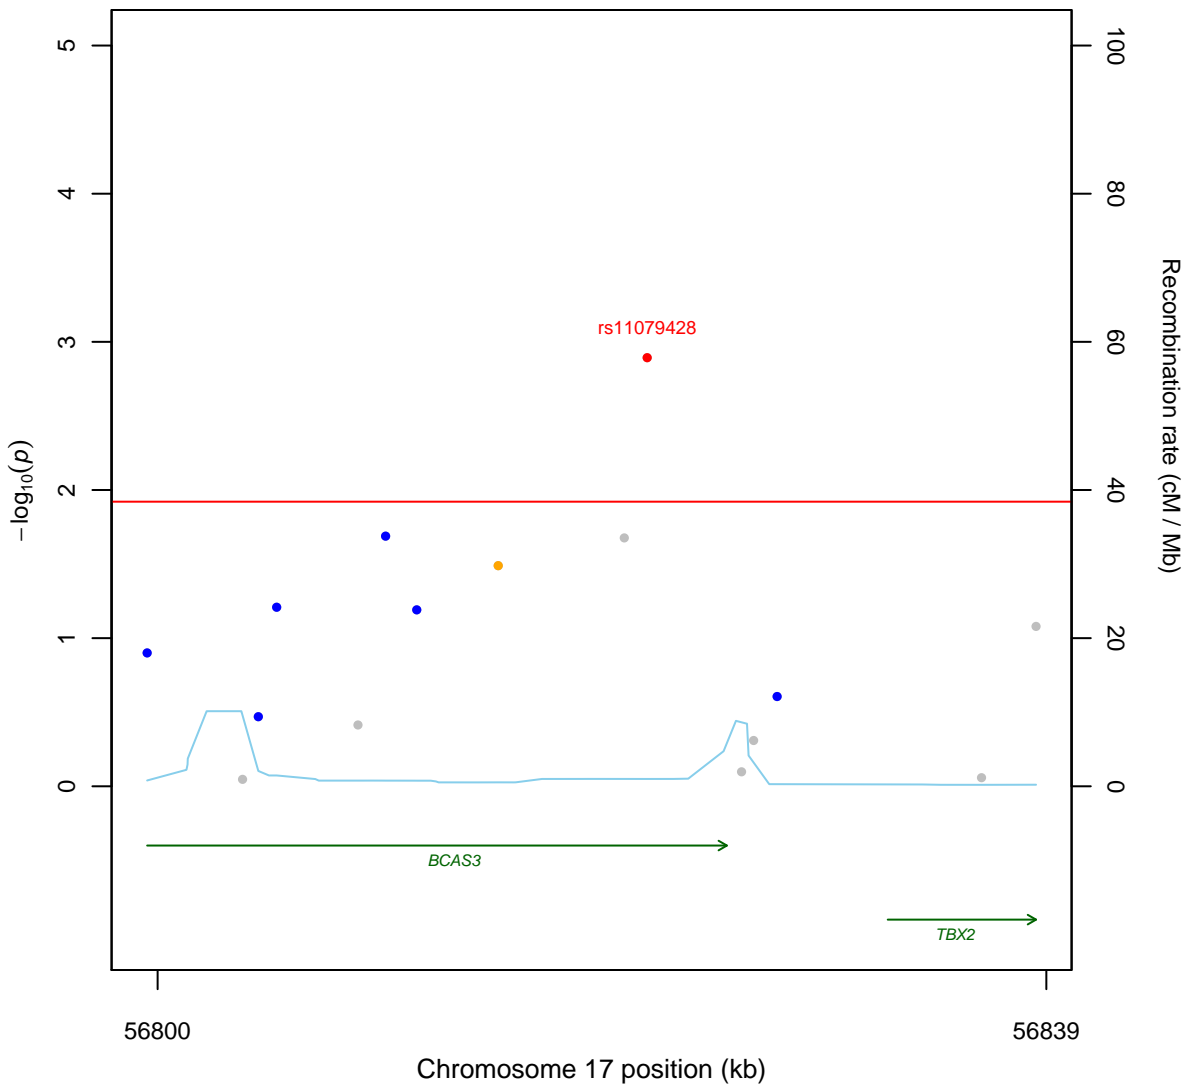

SLC7A9

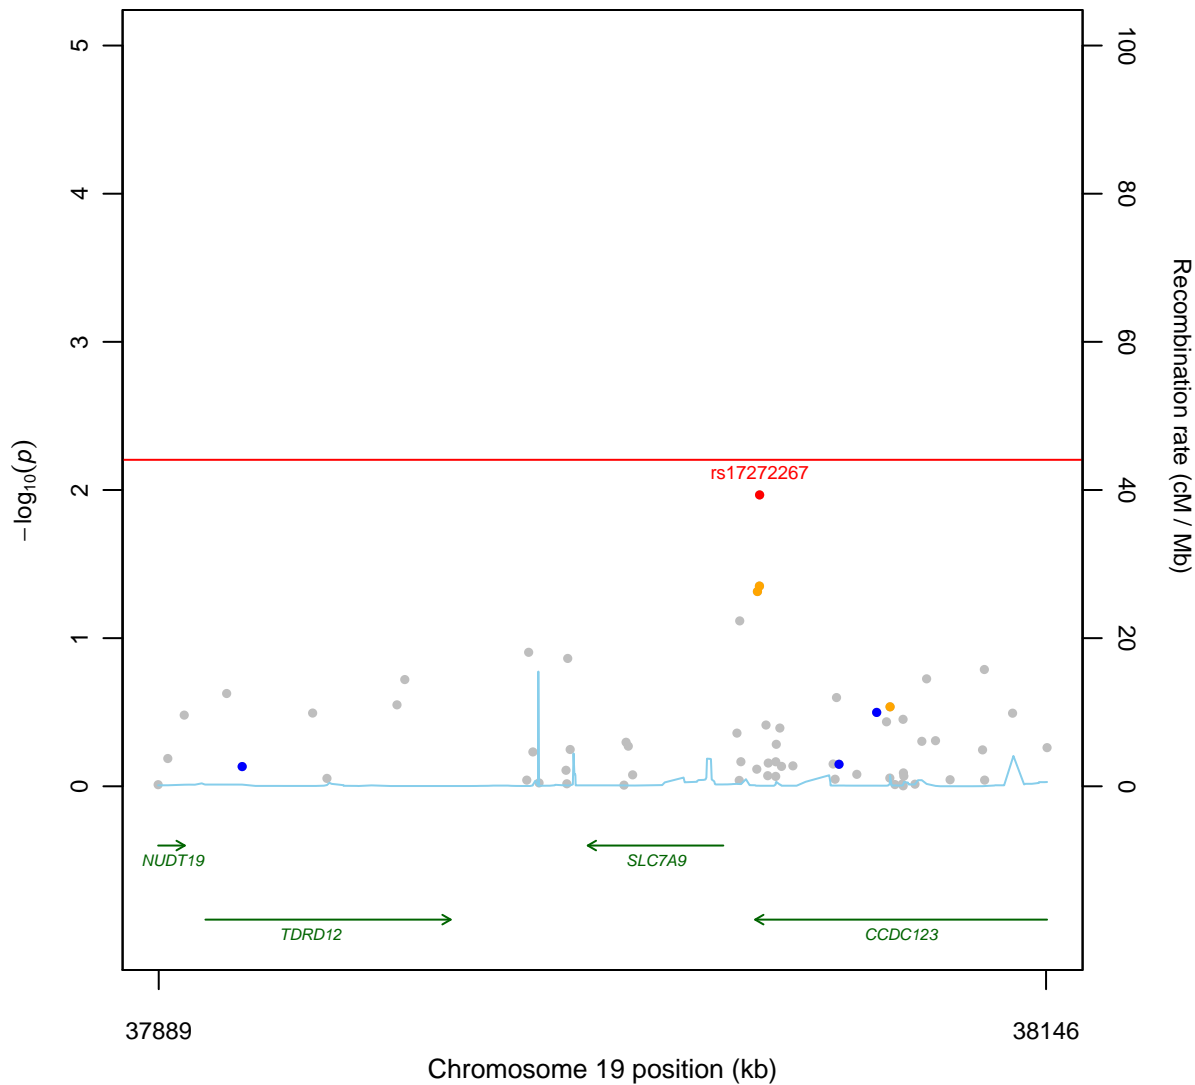

Supplement: pone.0045112.s001.pdf [file pone.0045112.s001.pdf]
