# Supplementary material for: Multiple Loci Associated with Renal Function in African Americans
Source: PubMed Central journal article supplement (PMC3441677; doi:10.1371/journal.pone.0045112), 2012-09-13

**A**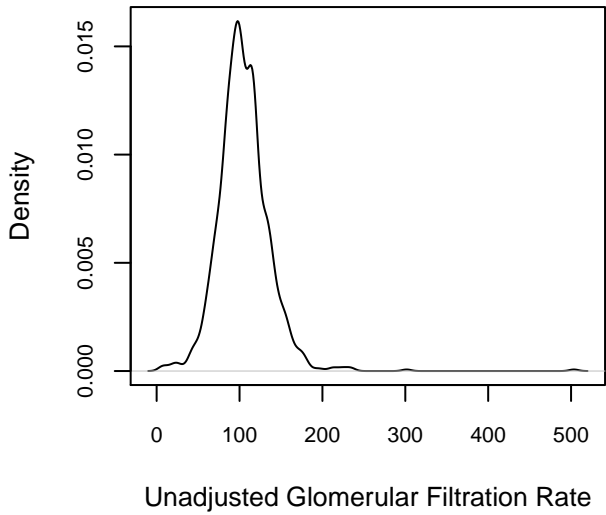**B**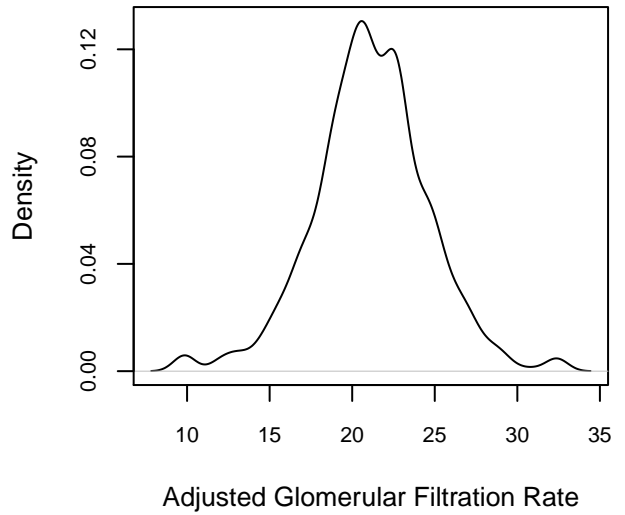

Supplement: pone.0045112.s005.pdf [file pone.0045112.s005.pdf]
